# Supplementary material
Source: publisher figshare collection journal article supplement (https://tandf.figshare.com/ndownloader/files/22023318)
Supplement: Supplementary file 1 [file 22023318]

## Responses of hypocotyl growth and seedling emergence with respect to soil sowing depth stress in peanut (*Arachis hypogaea* L.)

Xiaoyu Zhen, Fang Gao, Xiangdong Li, Zhaoxin Liu, Jihao Zhao, Ying Li, Ying Wang,  
Yuerong Li, Zhaoyi Wang, Huajiang Lai, Xiaoyi Pan, Dongqing Yang

### Supplemental material

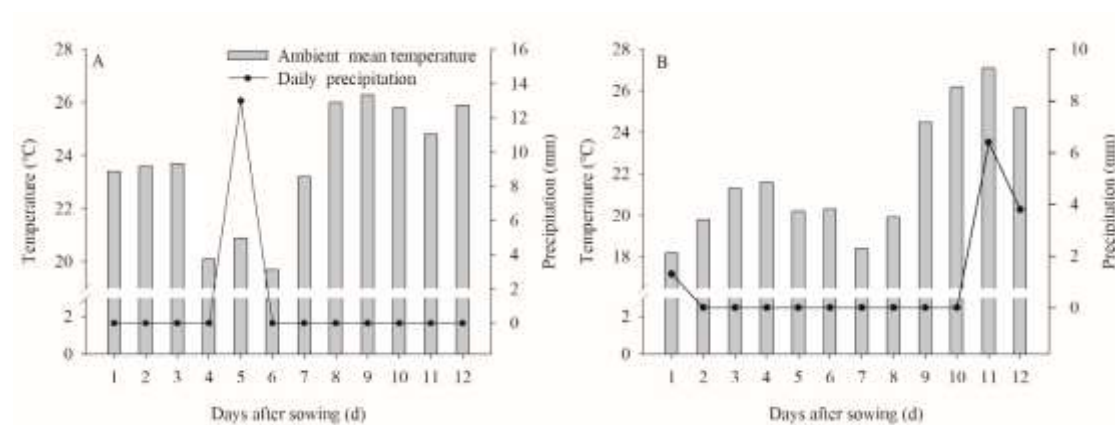

Figure S1. Changes of daily mean temperature and precipitation from 1 to 12 days after sowing in 2017 (A) and 2018 (B) growth seasons, respectively.
